# Supplementary material for: Sustainable bimetallic Cu/Ni catalysts: leveraging glucose for enhanced immobilization on magnetic Fe 3 O 4 /amino natural asphalt composites in coupling reactions
Source: Royal Society of Chemistry journal article supplement (doi:10.1039/d5na00899a), 2025-12-02
Supplement: d5na00899a1.pdf [file d5na00899a1.pdf]

## Supporting Information

### **Sustainable Bimetallic Cu/Ni Catalysts: Leveraging Glucose for Enhanced Immobilization on Magnetic Fe<sub>3</sub>O<sub>4</sub>/Amino Natural Asphalt Composites in Coupling Reactions**

Sahar Abdolahi <sup>a</sup>, Mohammad Soleiman-Beigi <sup>a,\*</sup>

---

<sup>a</sup> Department of Chemistry, Faculty of Basic Sciences, Ilam University, P.O. Box 69315516, Ilam, Iran.  
*E-mail:* [SoleimanBeigi@yahoo.com](mailto:SoleimanBeigi@yahoo.com); [m.soleimanbeigi@ilam.ac.ir](mailto:m.soleimanbeigi@ilam.ac.ir)

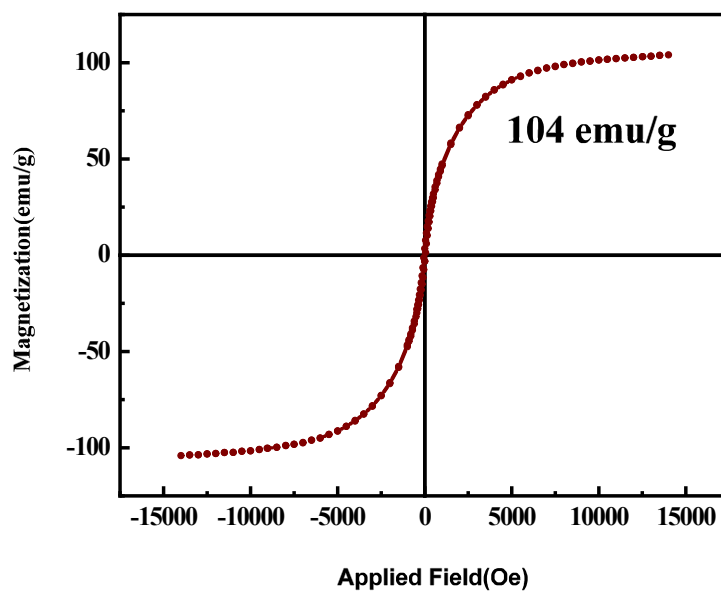

**Fig. S1** VSM diagram of  $\text{Fe}_3\text{O}_4@\text{NA-NH}_2$

In the interpretation of the infrared spectrum of D-glucose, the most prominent absorption bands appear in the wavenumber range from approximately 2500 to 3700  $\text{cm}^{-1}$ , consisting of two broad overlapping bands due to O-H and C-H stretching vibrations. These bands are complicated by hydrogen bonding, which affects the O-H vibration frequencies, and the O-H vibrations can originate from both primary and secondary alcohol groups. Absorptions in the region of 3200 to 3500  $\text{cm}^{-1}$  are mainly attributed to O-H stretching vibrations, with twin peaks possibly arising from both primary and secondary alcohol groups, while absorptions between 2800 and 3000  $\text{cm}^{-1}$  are primarily due to C-H stretching vibrations. The C-O stretching vibrations of the ether C-O-C group occur around 1070 to 1140  $\text{cm}^{-1}$ , whereas C-O vibrations from a primary alcohol group typically appear between 1000 and 1075  $\text{cm}^{-1}$ , and those from a secondary alcohol group occur around 1075 to 1150  $\text{cm}^{-1}$ .

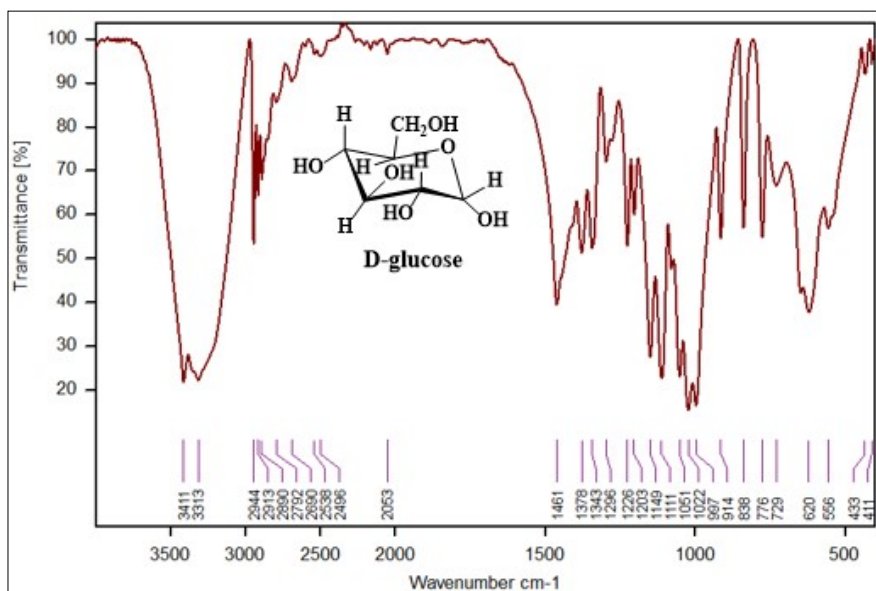

**Fig. S2** FT-IR of D-glucose

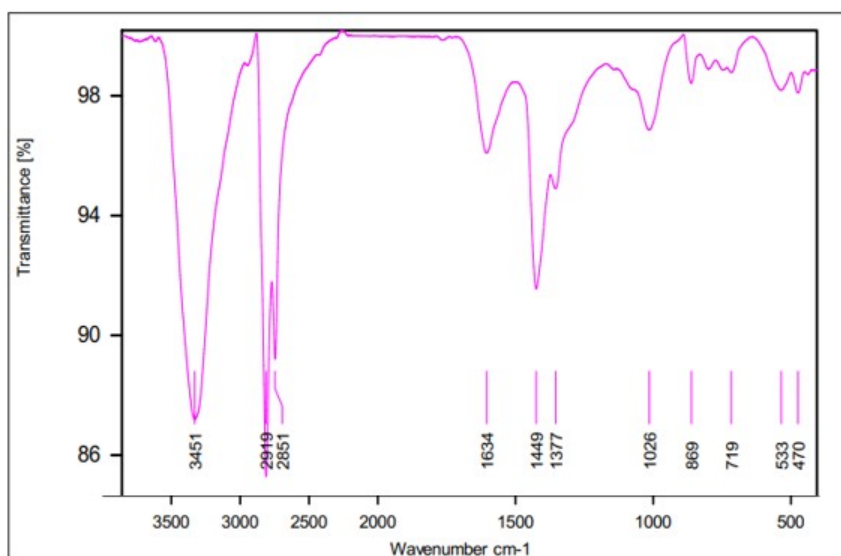

**Fig. 3** FT-IR spectrum of NA

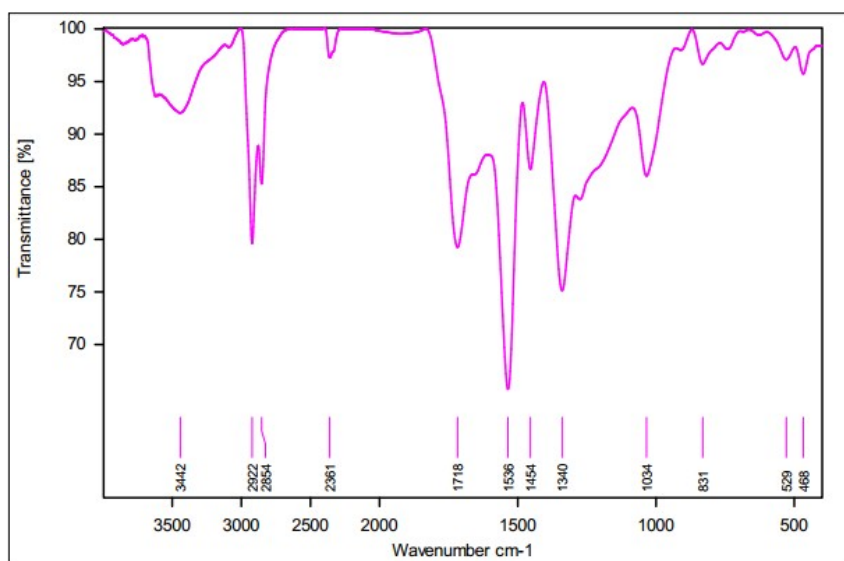

**Fig. 4** FT-IR spectrum of NA-NO<sub>2</sub>

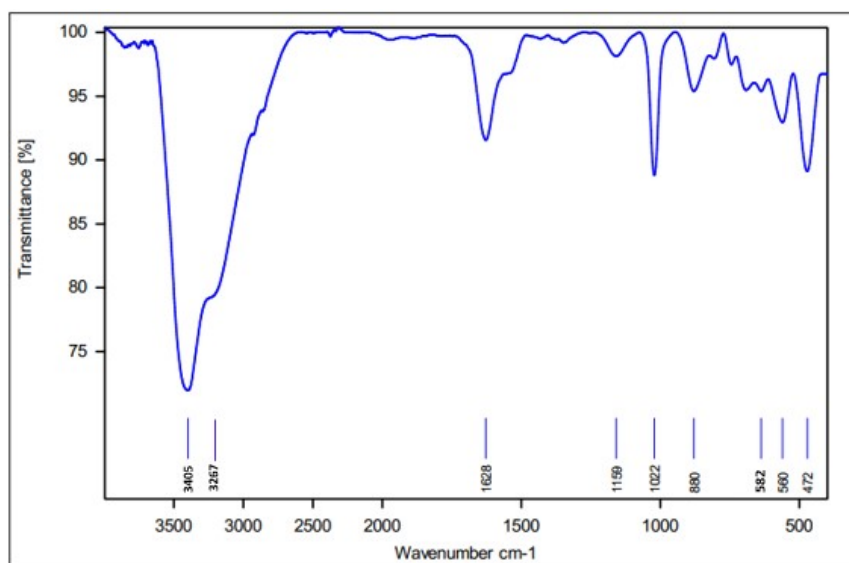

**Fig. 5** FT-IR spectrum of Fe<sub>3</sub>O<sub>4</sub>@NA-NH<sub>2</sub>

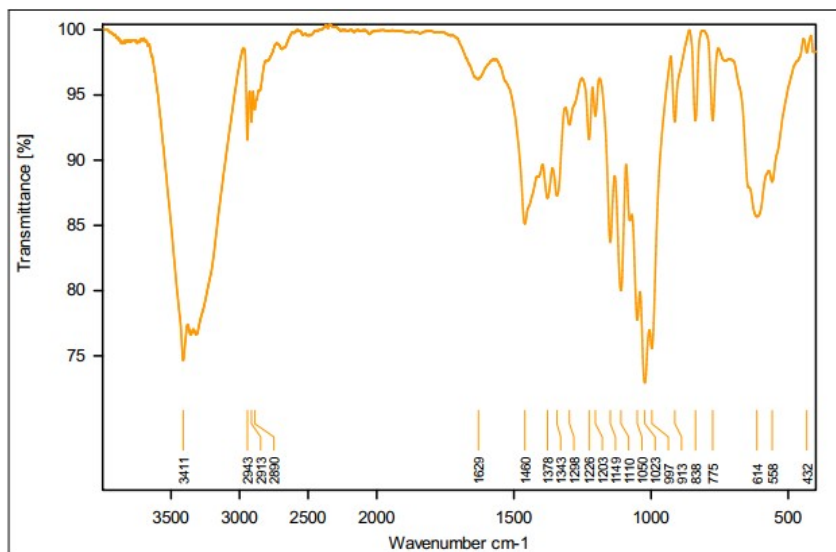

**Fig. 6** FT-IR spectrum of NA-Fe<sub>3</sub>O<sub>4</sub>@glucose

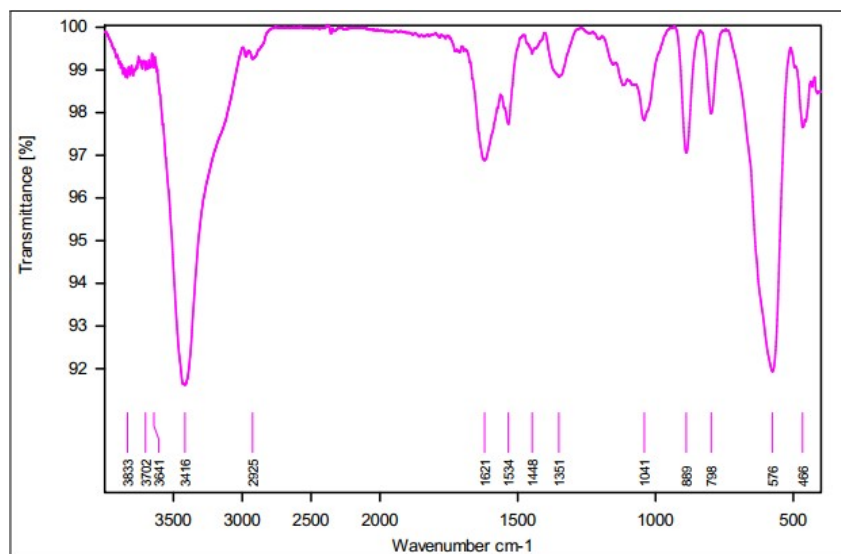

**Fig. 7** FT-IR spectrum of NA-Fe<sub>3</sub>O<sub>4</sub>@glucose@Cu-Ni

Table S1 indicates the standard reference files for the XRD peaks of the ferrite phases  $\text{Fe}_3\text{O}_4$ ,  $\text{NiFe}_2\text{O}_4$ , and  $\text{CuFe}_2\text{O}_4$ . These reference files provide the characteristic peak positions and crystal structures that are used for phase identification in XRD analysis.  $\text{Fe}_3\text{O}_4$ , and  $\text{NiFe}_2\text{O}_4$  are well-studied and widely referenced, with their peaks typically observed around specific  $2\theta$  angles.  $\text{CuFe}_2\text{O}_4$  is less commonly documented but exhibits similar peak patterns due to its similar cubic spinel structure.

**Table S1** Standard reference files for XRD peaks.

| Phase                                               | Standard number<br>(JCPDS/ICDD) | reference | Crystal structure | Details                                                                                       |
|-----------------------------------------------------|---------------------------------|-----------|-------------------|-----------------------------------------------------------------------------------------------|
| $\text{Fe}_3\text{O}_4$ ( <b>Magnetite</b> )        | 19-0629                         |           | Cubic (Fd-3m)     | Main peaks around $30^\circ$ , $35^\circ$ , $43^\circ$ , $53^\circ$ , $57^\circ$ , $62^\circ$ |
| $\text{NiFe}_2\text{O}_4$ ( <b>Nickel Ferrite</b> ) | 10-0325                         |           | Cubic (Fd-3m)     | Similar peak positions to $\text{Fe}_3\text{O}_4$ , with slight differences                   |
| $\text{CuFe}_2\text{O}_4$ ( <b>Copper Ferrite</b> ) | 11-0835                         |           | Cubic (Fd-3m)     | Less common in references, but has similar peaks to other ferrites                            |

**Table S2** Optimization of different base amounts for the synthesis of 1,1'-biphenyl using NA-Fe<sub>3</sub>O<sub>4</sub>@glucose@Cu-Ni.

| 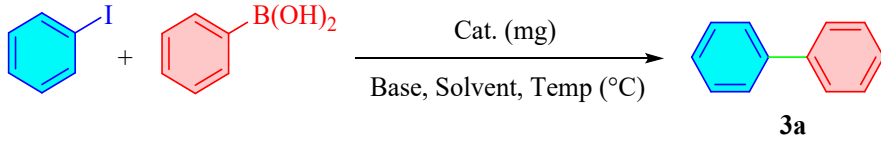 |                                 |                       |                  |         |                         |                        |
|------------------------------------------------------------------------------------|---------------------------------|-----------------------|------------------|---------|-------------------------|------------------------|
| Entry                                                                              | Base                            | Amount of base (mmol) | Temperature (°C) | Solvent | Amount of catalyst (mg) | Yield (%) <sup>b</sup> |
| 1                                                                                  | K <sub>2</sub> CO <sub>3</sub>  | 1                     | 80               | PEG     | 10                      | 99                     |
| 2                                                                                  | K <sub>2</sub> CO <sub>3</sub>  | 2                     | 80               | PEG     | 10                      | 99                     |
| 3                                                                                  | K <sub>2</sub> CO <sub>3</sub>  | 3                     | 80               | PEG     | 10                      | 98                     |
| 4                                                                                  | Ca <sub>2</sub> CO <sub>3</sub> | 1                     | 80               | PEG     | 10                      | 93                     |
| 5                                                                                  | Ca <sub>2</sub> CO <sub>3</sub> | 2                     | 50               | PEG     | 10                      | 94                     |
| 6                                                                                  | Ca <sub>2</sub> CO <sub>3</sub> | 3                     | 80               | PEG     | 10                      | 93                     |
| 7                                                                                  | Na <sub>2</sub> CO <sub>3</sub> | 1                     | 80               | PEG     | 10                      | 94                     |
| 8                                                                                  | Na <sub>2</sub> CO <sub>3</sub> | 2                     | 80               | PEG     | 10                      | 95                     |
| 9                                                                                  | Na <sub>2</sub> CO <sub>3</sub> | 3                     | 80               | PEG     | 10                      | 94                     |
| 10                                                                                 | Cs <sub>2</sub> CO <sub>3</sub> | 1                     | 80               | PEG     | 10                      | 90                     |
| 11                                                                                 | Cs <sub>2</sub> CO <sub>3</sub> | 2                     | 80               | PEG     | 10                      | 91                     |
| 12                                                                                 | Cs <sub>2</sub> CO <sub>3</sub> | 3                     | 80               | PEG     | 10                      | 91                     |
| 13                                                                                 | NaOH                            | 1                     | 80               | PEG     | 10                      | 91                     |
| 14                                                                                 | NaOH                            | 2                     | 80               | PEG     | 10                      | 93                     |
| 15                                                                                 | NaOH                            | 3                     | 80               | PEG     | 10                      | 92                     |
| 16                                                                                 | KOH                             | 1                     | 80               | PEG     | 10                      | 92                     |
| 17                                                                                 | KOH                             | 2                     | 80               | PEG     | 10                      | 94                     |
| 18                                                                                 | KOH                             | 3                     | 80               | PEG     | 10                      | 93                     |



**Table S3** Optimization of different base amounts for the synthesis of sulfides using NA-Fe<sub>3</sub>O<sub>4</sub>@glucose@Cu-Ni.

| 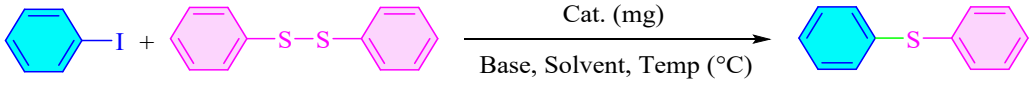 |                                 |                       |                  |         |                         |                        |
|------------------------------------------------------------------------------------|---------------------------------|-----------------------|------------------|---------|-------------------------|------------------------|
| <b>5a</b>                                                                          |                                 |                       |                  |         |                         |                        |
| Entry                                                                              | Base                            | Amount of base (mmol) | Temperature (°C) | Solvent | Amount of catalyst (mg) | Yield (%) <sup>b</sup> |
| 1                                                                                  | KOH                             | 1                     | 80               | PEG     | 20                      | 98                     |
| 2                                                                                  | KOH                             | 2                     | 80               | PEG     | 20                      | 98                     |
| 3                                                                                  | KOH                             | 3                     | 80               | PEG     | 20                      | 97                     |
| 4                                                                                  | Cs <sub>2</sub> CO <sub>3</sub> | 1                     | 80               | PEG     | 20                      | 90                     |
| 5                                                                                  | Cs <sub>2</sub> CO <sub>3</sub> | 2                     | 50               | PEG     | 20                      | 91                     |
| 6                                                                                  | Cs <sub>2</sub> CO <sub>3</sub> | 3                     | 80               | PEG     | 20                      | 91                     |
| 7                                                                                  | NaOH                            | 1                     | 80               | PEG     | 20                      | 97                     |
| 8                                                                                  | NaOH                            | 2                     | 80               | PEG     | 20                      | 97                     |
| 9                                                                                  | NaOH                            | 3                     | 80               | PEG     | 20                      | 96                     |
| 10                                                                                 | Na <sub>2</sub> CO <sub>3</sub> | 1                     | 80               | PEG     | 20                      | 91                     |
| 11                                                                                 | Na <sub>2</sub> CO <sub>3</sub> | 2                     | 80               | PEG     | 20                      | 92                     |
| 12                                                                                 | Na <sub>2</sub> CO <sub>3</sub> | 3                     | 80               | PEG     | 20                      | 91                     |
| 13                                                                                 | K <sub>2</sub> CO <sub>3</sub>  | 1                     | 80               | PEG     | 10                      | 92                     |
| 14                                                                                 | K <sub>2</sub> CO <sub>3</sub>  | 2                     | 80               | PEG     | 10                      | 92                     |
| 15                                                                                 | K <sub>2</sub> CO <sub>3</sub>  | 3                     | 80               | PEG     | 10                      | 91                     |

Spectral data of some of the products:

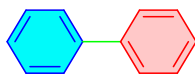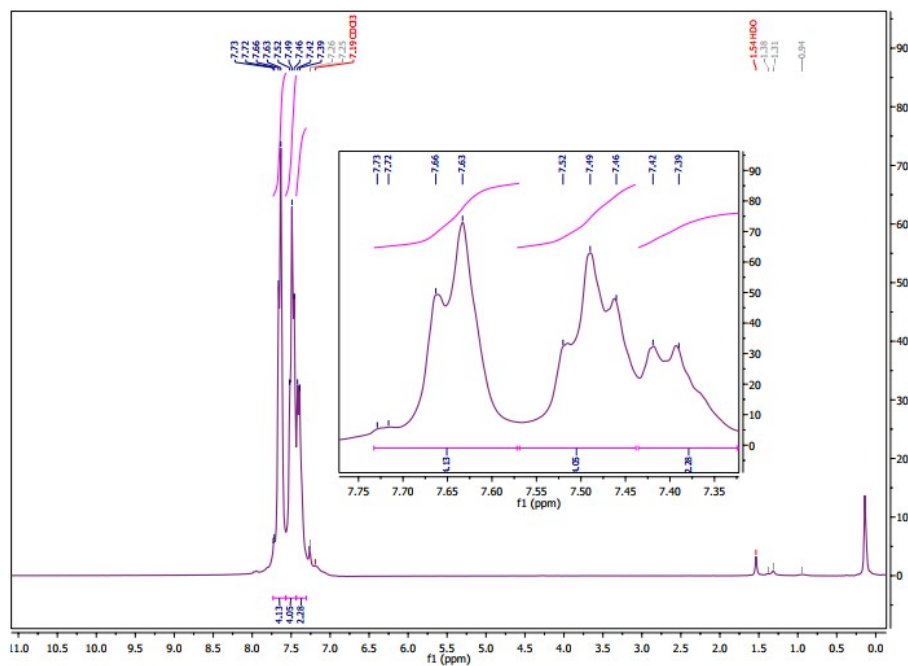

Fig. S8 <sup>1</sup>H NMR of 1,1'-biphenyl

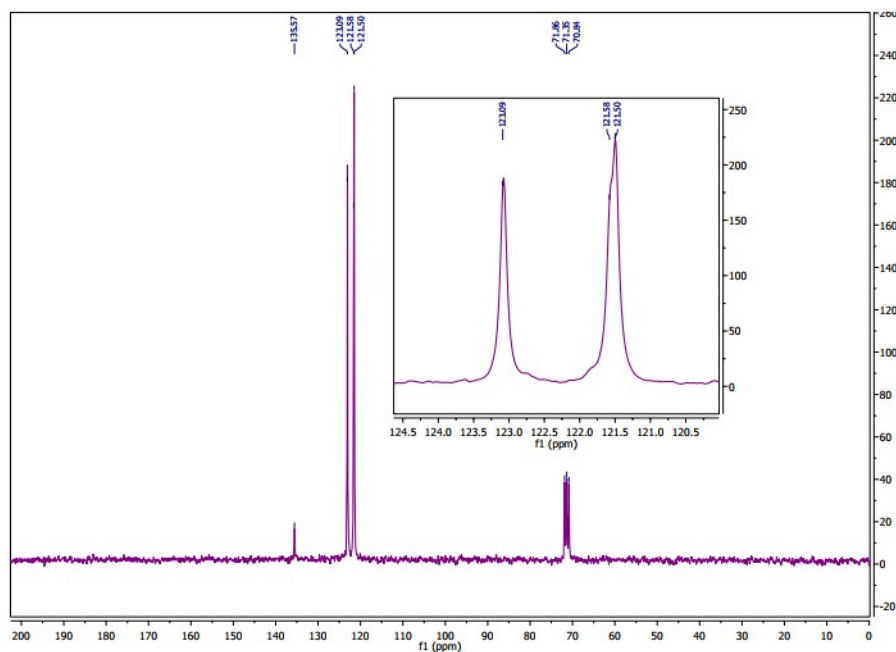

Fig. S9 <sup>13</sup>C NMR of 1,1'-biphenyl

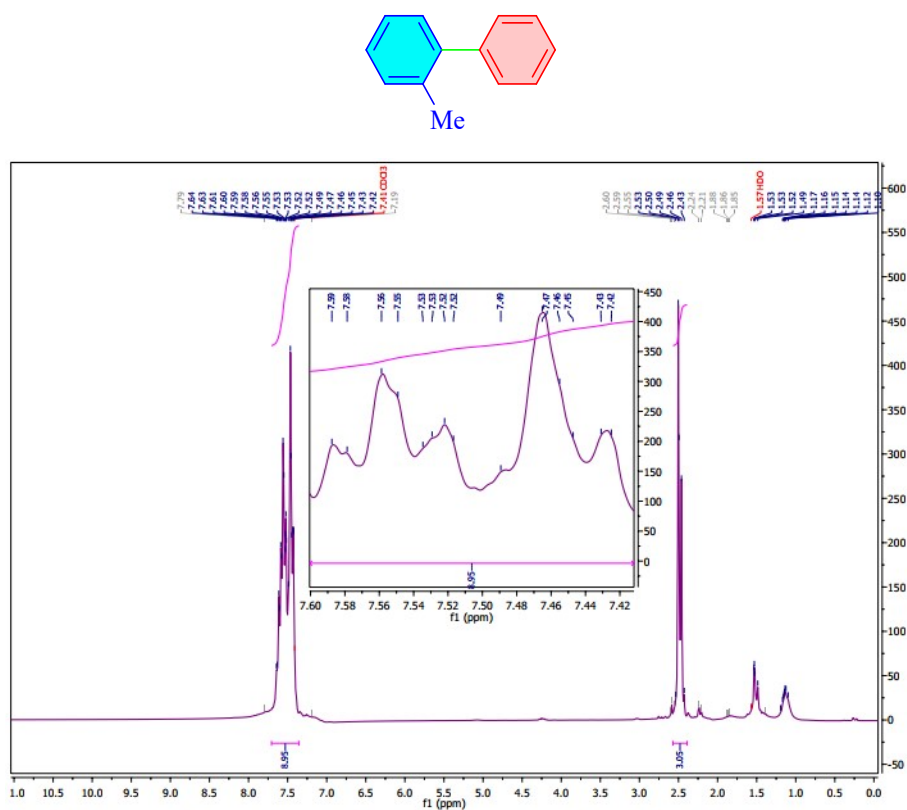

**Fig. S10**  $^1\text{H}$  NMR of 2-methyl-1,1'-biphenyl

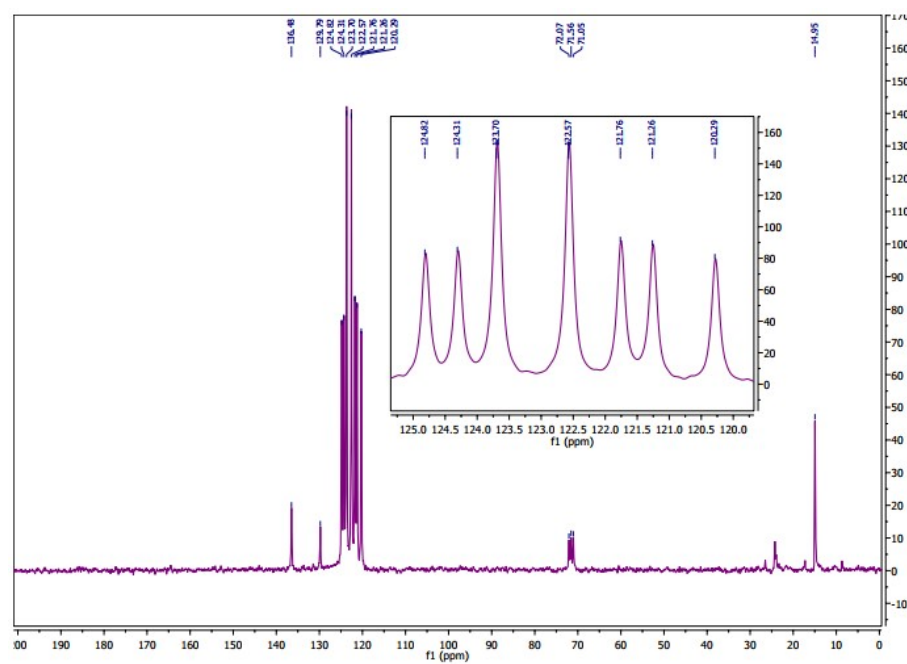

**Fig. S11**  $^{13}\text{C}$  NMR of 2-methyl-1,1'-biphenyl

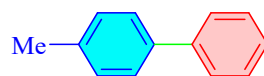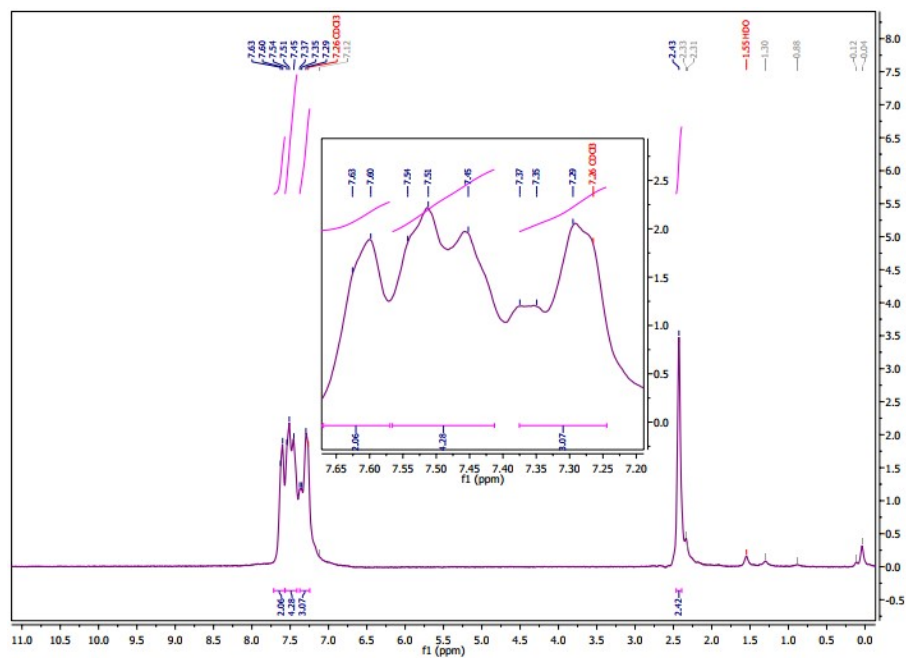

**Fig. S12** <sup>1</sup>H NMR of 4-methyl-1,1'-biphenyl

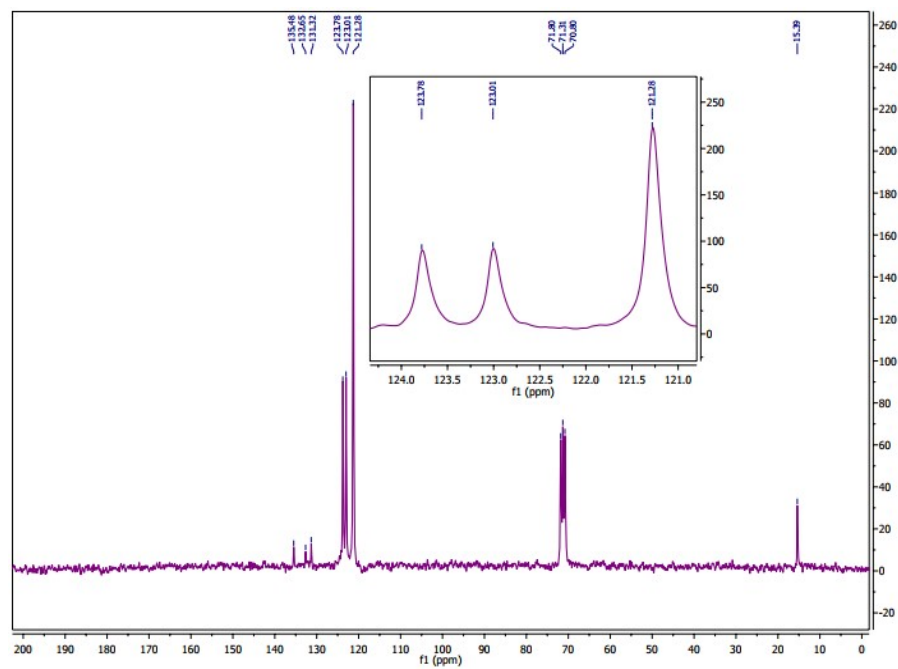

**Fig. S13** <sup>13</sup>C NMR of 4-methyl-1,1'-biphenyl

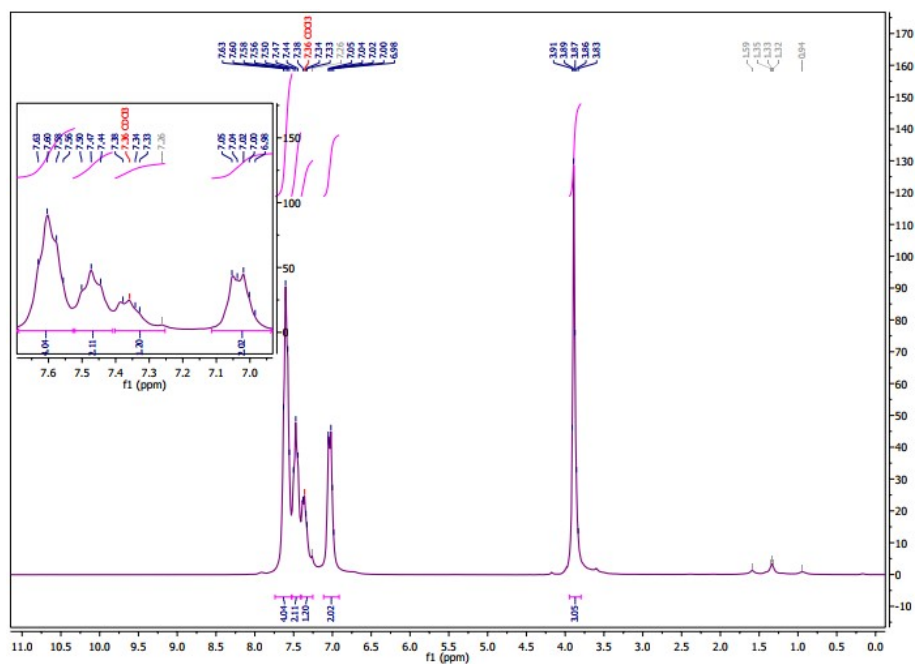

133.51  
125.17  
126.11  
122.07  
122.08  
121.06  
108.56  
71.49  
71.39  
70.88  
49.65

123.07  
122.49  
121.08  
121.06

124.5 124.0 123.5 123.0 122.5 122.0 121.5 121.0  
f1 (ppm)

**Fig. S15**  $^{13}\text{C}$  NMR of 4-methoxy-1,1'-biphenyl

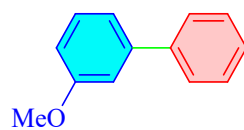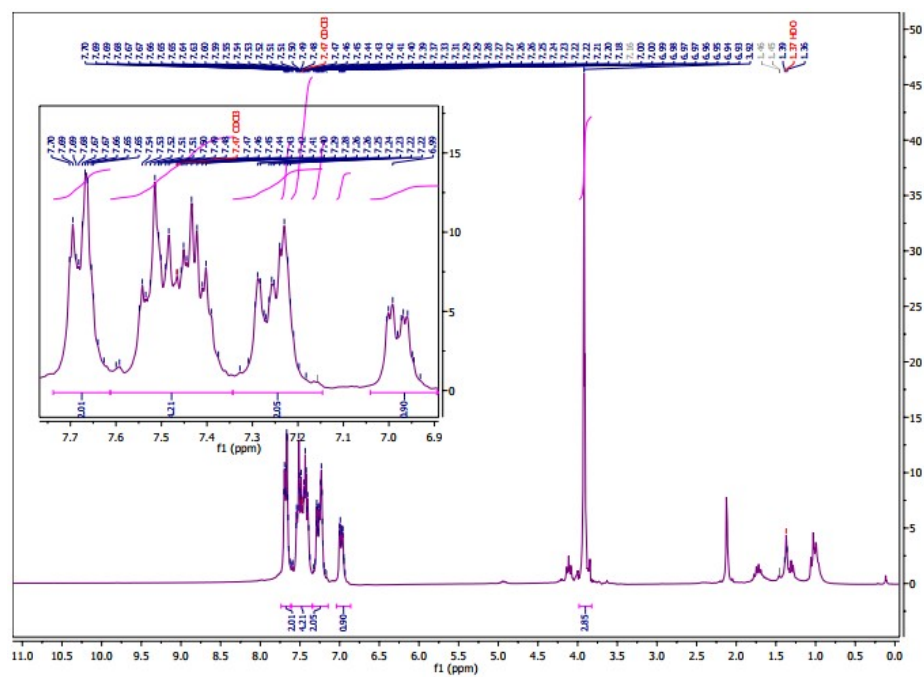

**Fig. S16**  $^1\text{H}$  NMR of 3-methoxy-1,1'-biphenyl

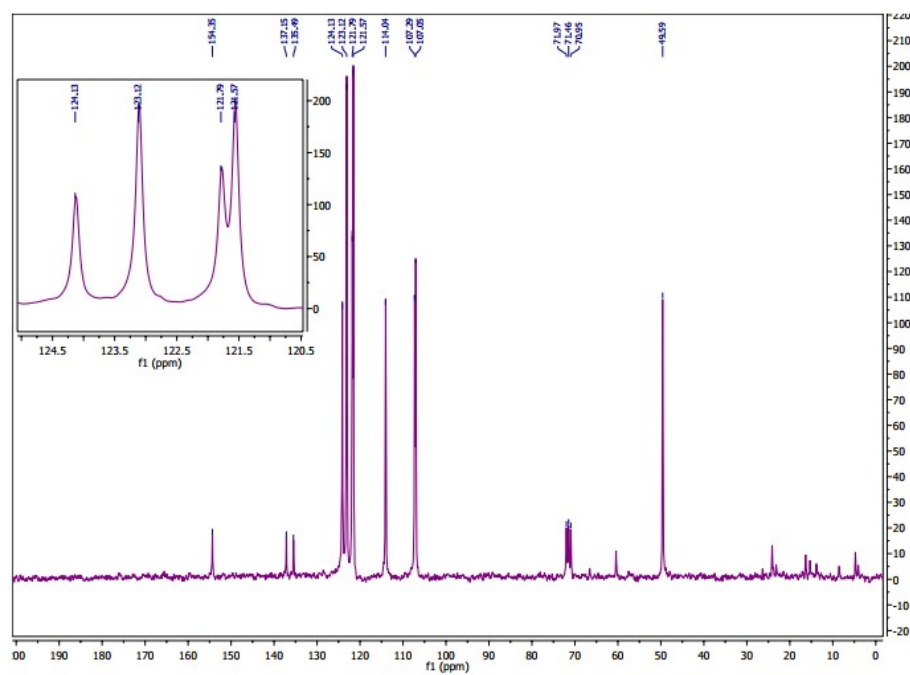

**Fig. S17**  $^{13}\text{C}$  NMR of 3-methoxy-1,1'-biphenyl

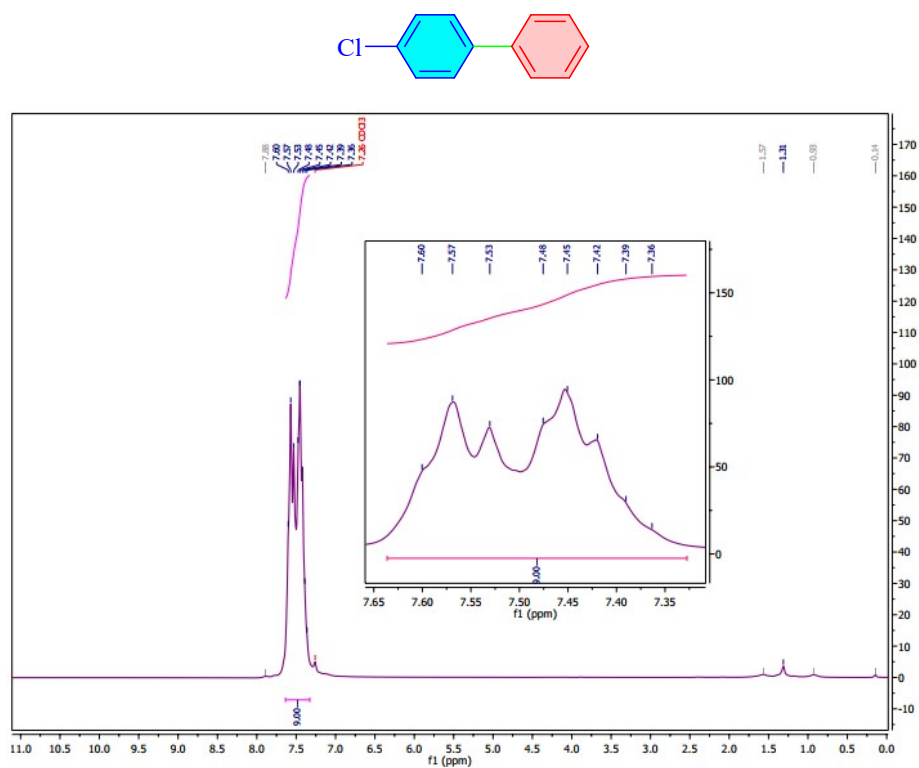

**Fig. S18**  $^1\text{H}$  NMR of 4-chloro-1,1'-biphenyl

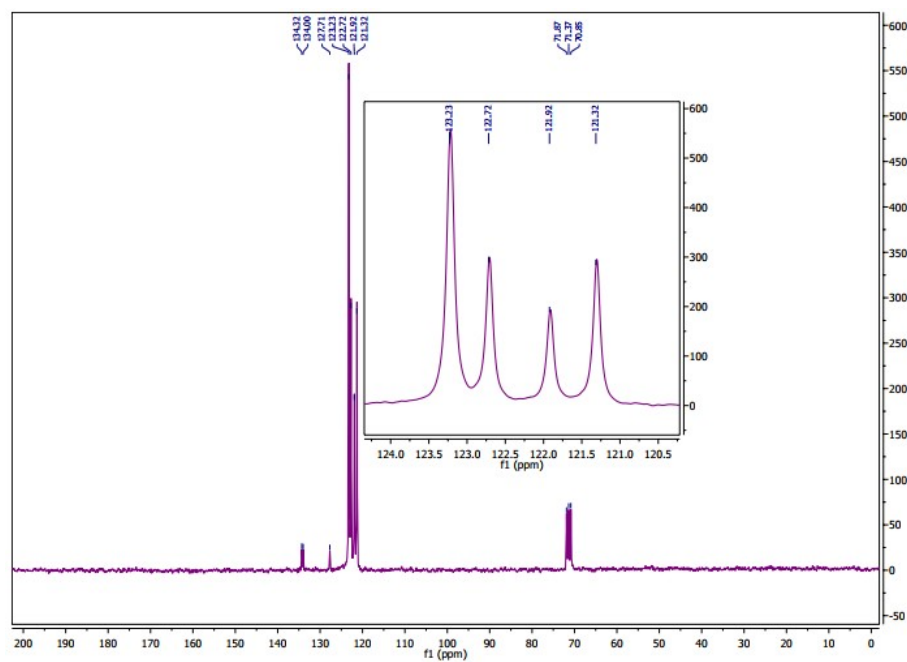

**Fig. S19**  $^{13}\text{C}$  NMR of 4-chloro-1,1'-biphenyl

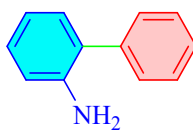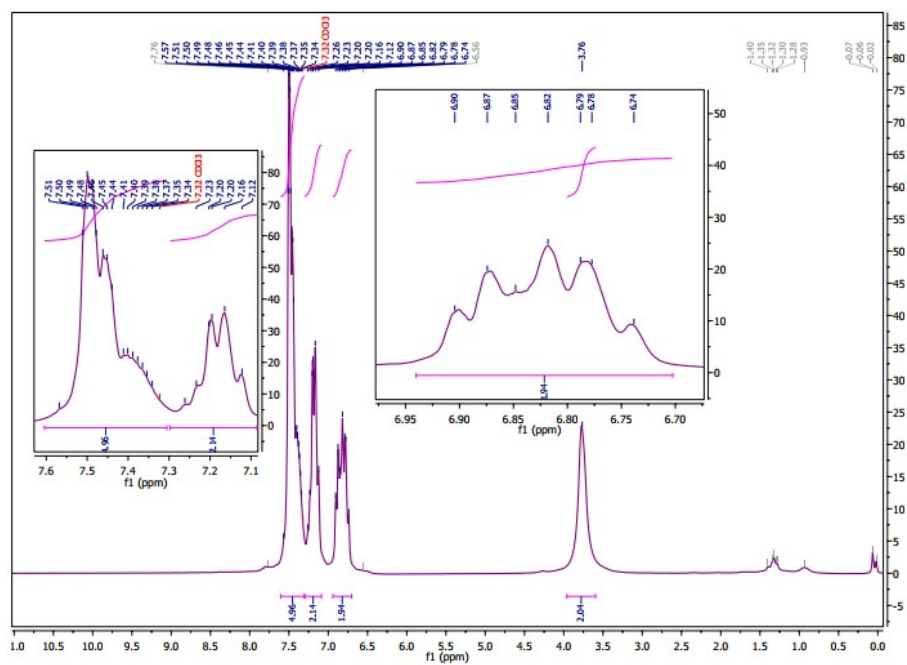

Fig. S20  $^1\text{H}$  NMR of 2-Aminobiphenyl

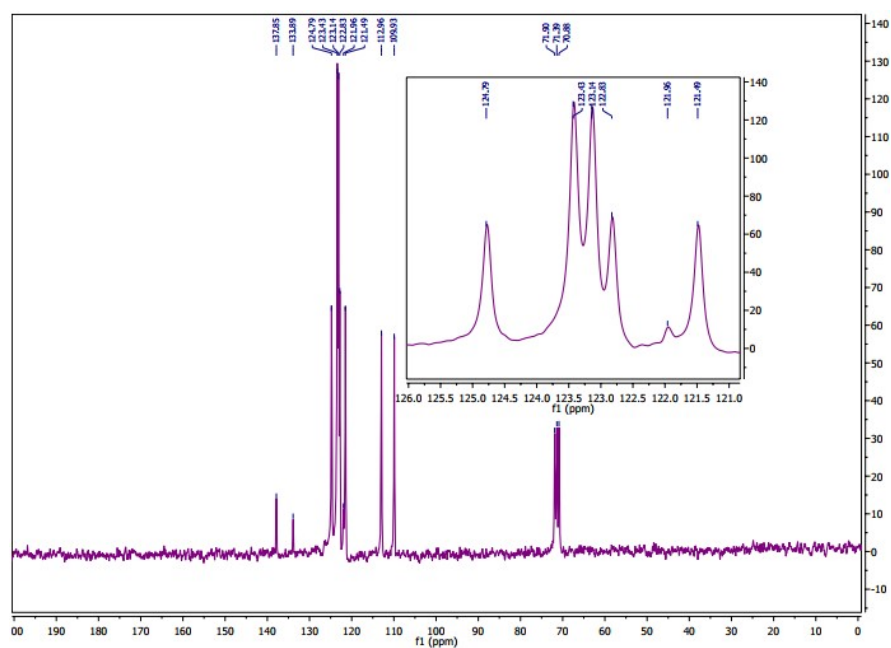

Fig. S21  $^{13}\text{C}$  NMR of 2-Aminobiphenyl



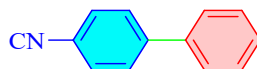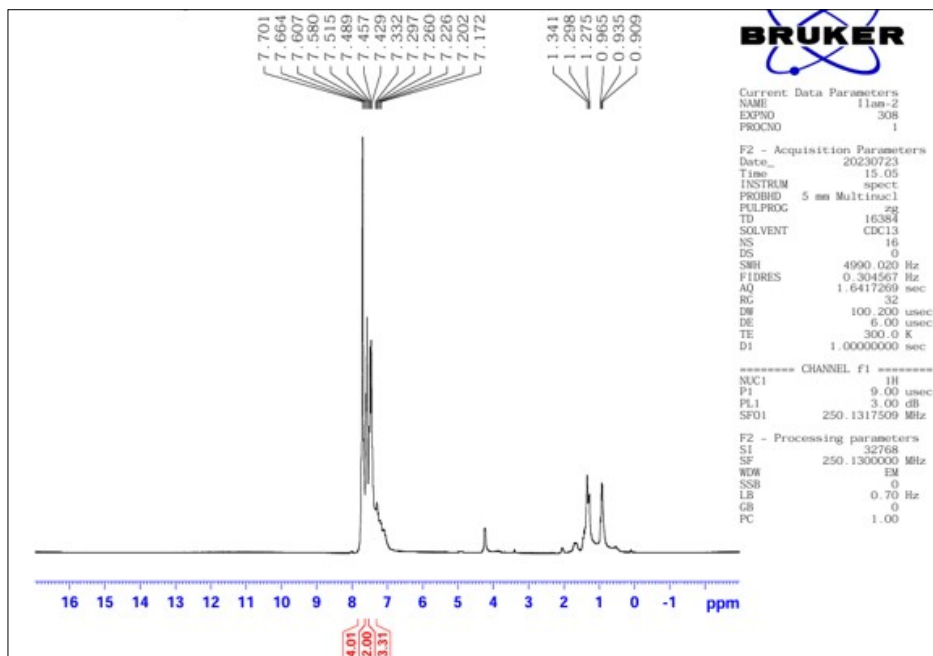

Fig. S22 <sup>1</sup>H NMR of 4-cyano-1,1'-biphenyl

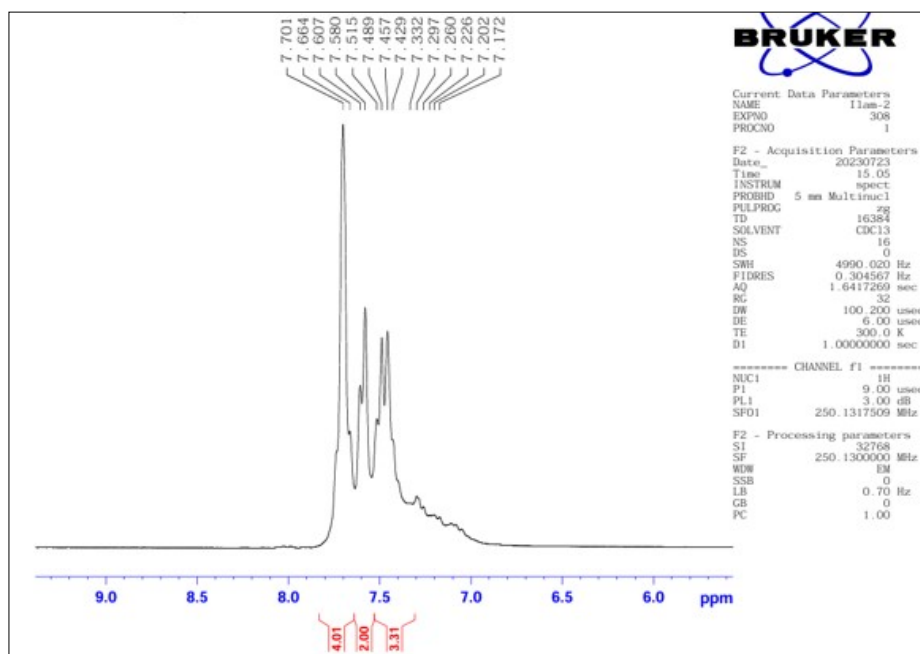

Fig. S23 <sup>1</sup>H NMR of 4-cyano-1,1'-biphenyl (Expand)

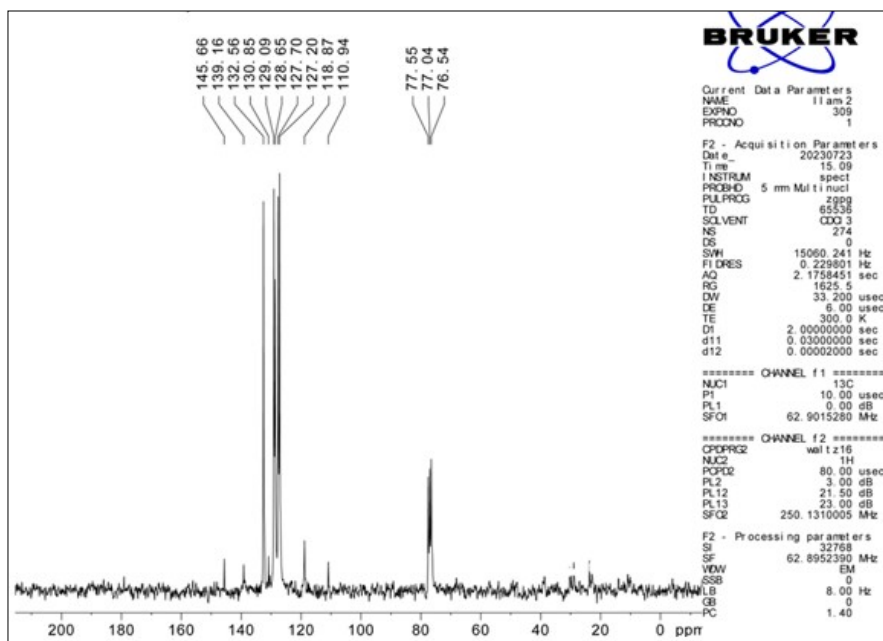

**Fig. S24**  $^{13}\text{C}$  NMR of 4-cyano-1,1'-biphenyl

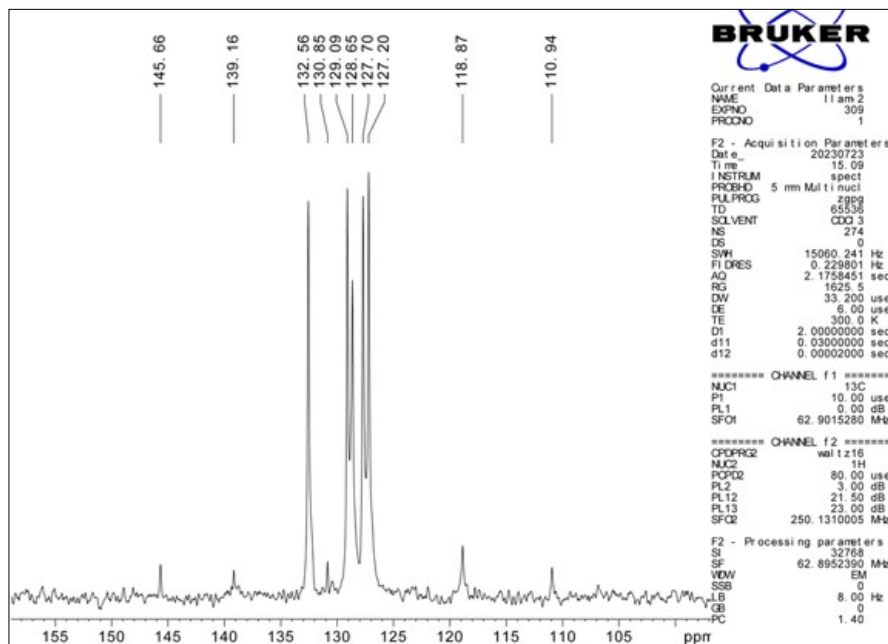

**Fig. S25**  $^{13}\text{C}$  NMR of 4-cyano-1,1'-biphenyl (Expand)

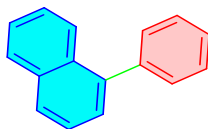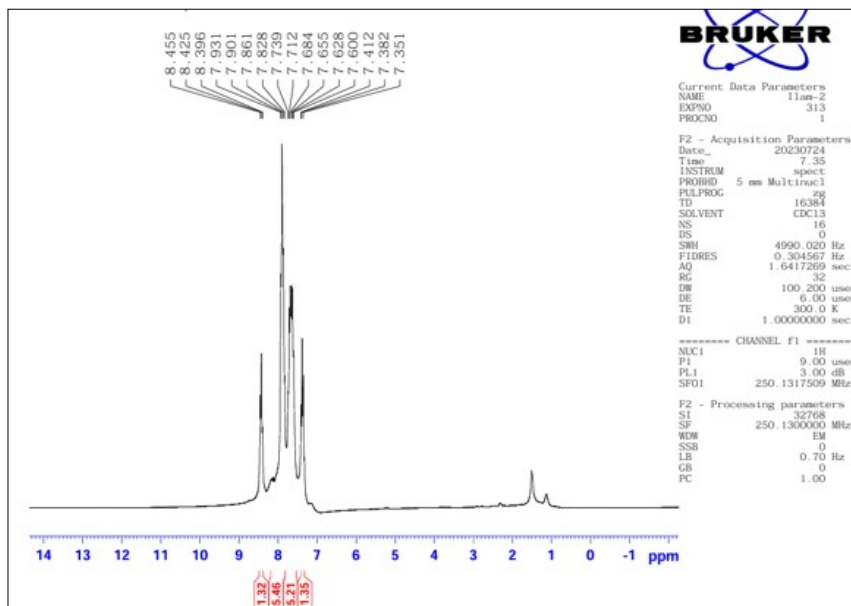

**Fig. S26**  $^1\text{H}$  NMR of 1-phenylnaphthalene

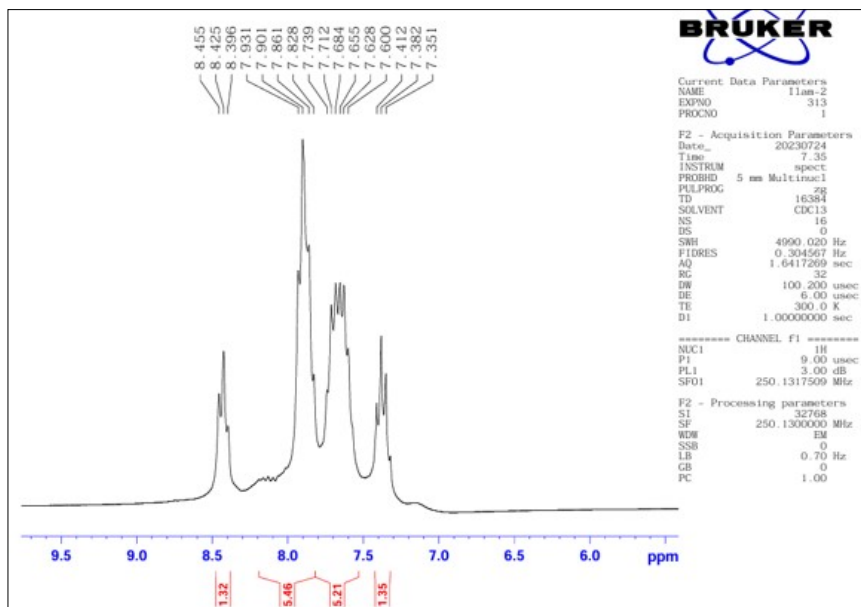

**Fig. S27**  $^1\text{H}$  NMR of 1-phenylnaphthalene (Expand)

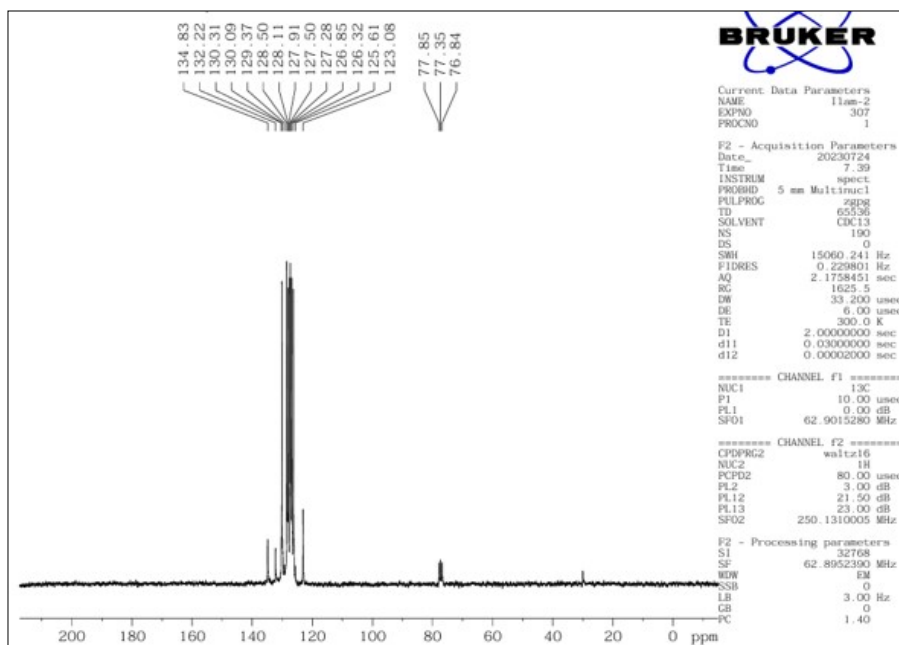

**Fig. S28**  $^{13}\text{C}$  NMR of 1-phenylnaphthalene

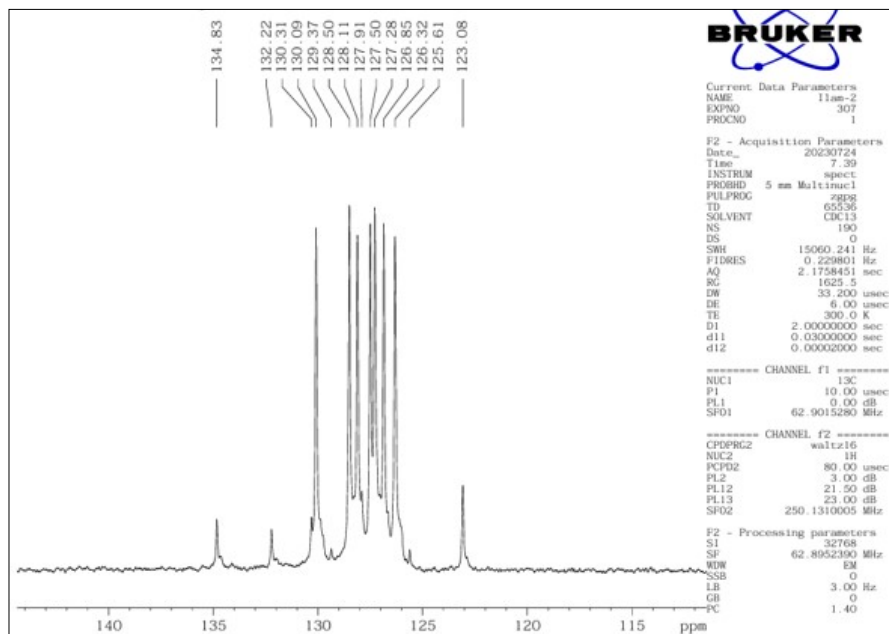

**Fig. S29**  $^{13}\text{C}$  NMR of 1-phenylnaphthalene (Expand)

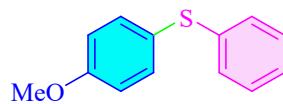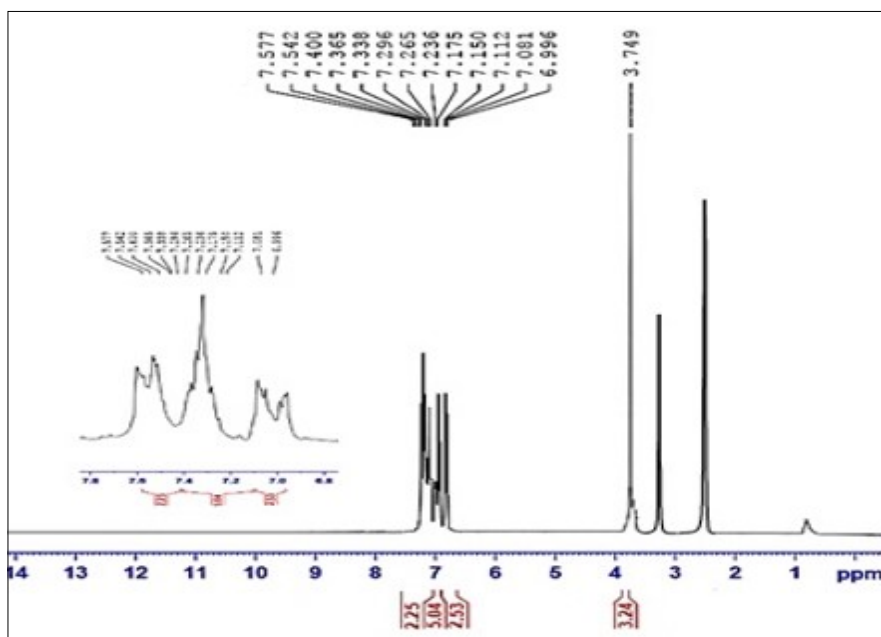

**Fig. S30** <sup>1</sup>H NMR of (4-methoxyphenyl)(phenyl)sulfide

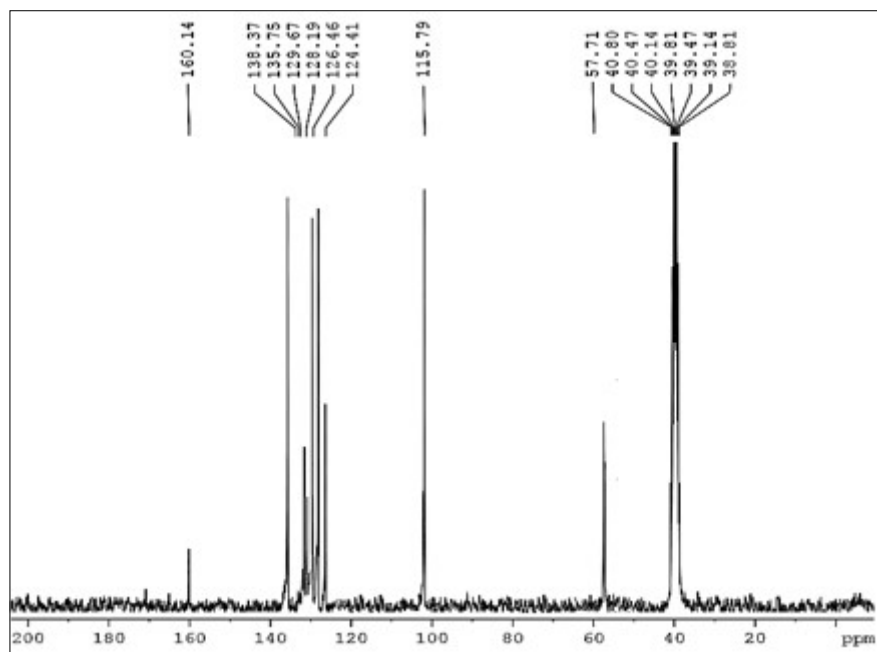

**Fig. S31** <sup>13</sup>C NMR of (4-methoxyphenyl)(phenyl)sulfide

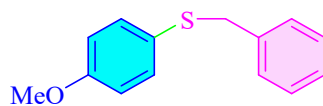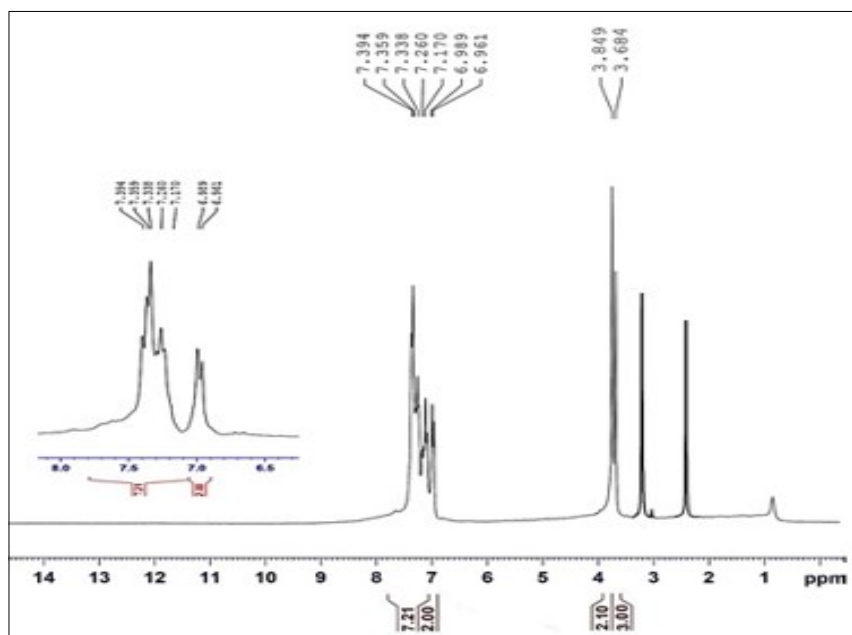

**Fig. S32** <sup>1</sup>H NMR of benzyl(4-methoxyphenyl)sulfane

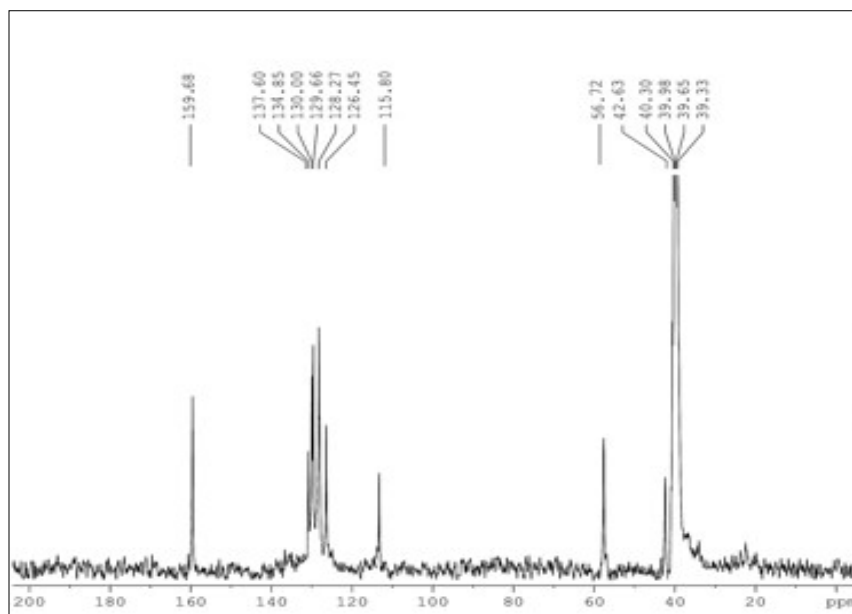

**Fig. S33** <sup>13</sup>C NMR of benzyl(4-methoxyphenyl)sulfane
